# Supplementary material for: Microwave assisted synthesis, characterization and thermoacoustical study of a β-naphthol-guanidine-formaldehyde copolymer resin
Source: Royal Society of Chemistry journal article supplement (doi:10.1039/c5nj02184g), 2015-11-16
Supplement: c5nj02184g1.pdf [file c5nj02184g1.pdf]

### Microwave assisted synthesis, characterization and thermoacoustical study of $\beta$ -Naphthol-guanidine-formaldehyde copolymer resin

Suraj D. Kukade,<sup>a</sup> Sunit Kumar Singh<sup>b</sup>, P. V. Tekade<sup>a</sup>, Ritesh R. Naik<sup>a</sup> and S. V. Bawankar<sup>a</sup>

<sup>a</sup>Department of Chemistry, Jankidevi Bajaj College of Science, Wardha-442001, India.

<sup>b</sup>Department of Chemistry, Visvesvaraya National Institute of Technology, Nagpur-440010, India.

#### Supplementary file:

##### Formulas used in this study:

$$\text{Adiabatic compressibility: } \beta = \left( \frac{1}{U^2 \rho} \right) \dots \dots \dots (1)$$

(U = Ultrasonic velocity of solution,  $\rho$  = Density of the solution)

$$\text{Acoustic impedance: } Z = U \times \rho \dots \dots \dots (2)$$

$$\text{Intermolecular free length: } L_f = K_T \times \sqrt{\beta} \dots \dots \dots (3)$$

( $K_T$  is Jacobson's constant,  $K_T = (93.875 + 0.375T) \times 10^{-8}$ )

and T = Absolute temperature in Kelvin)

$$\text{Relaxation time: } \tau = \frac{4\eta\beta}{3} \dots \dots \dots (4)$$

( $\eta$  = viscosity of solution)

$$\text{Relative association: } R_A = \left[ \frac{\rho}{\rho_0} \right] \times \left[ \frac{U}{U_0} \right]^{1/3} \dots \dots \dots (5)$$

( $\rho_0$  and  $U_0$  are the density and ultrasonic velocity of pure solvent)

$$\text{Gibb's free energy: } \Delta G^* = -2.303 kT \log \left[ \frac{h}{kT\tau} \right] \dots \dots \dots (6)$$

[(k = Boltzmann's constant ( $1.3806 \times 10^{-23} \text{ JK}^{-1}$ ) and h = Planck's constant ( $6.6250 \times 10^{-34} \text{ Jsec}$ )]

**Table 1:** Values of density, viscosity, ultrasonic velocity and related acoustical parameters of various concentration of solution at 298 K

| Conc. of solution (%) | Density( $\rho$ ) ( $10^3 \text{ Kg m}^{-3}$ ) | Viscosity( $\eta$ ) ( $10^{-3} \text{ Kg m}^{-1} \text{ s}^{-1}$ ) | Ultrasonic velocity (U) ( $\text{ms}^{-1}$ ) | Acoustic Impedance (Z) ( $10^3 \text{ Kg m}^{-2} \text{ s}^{-1}$ ) | Adiabatic compressibility ( $\beta$ ) ( $10^{-10} \text{ Kg}^{-1} \text{ ms}^2$ ) | Intermolecular free length( $L_f$ ) ( $10^{-11} \text{ m}$ ) | Relative association ( $R_A$ ) | Relaxation time( $\tau$ ) ( $10^{-13} \text{ sec.}$ ) | Gibb's free energy( $\Delta G^*$ ) ( $10^{-20} \text{ J mol}^{-1}$ ) |
|-----------------------|------------------------------------------------|--------------------------------------------------------------------|----------------------------------------------|--------------------------------------------------------------------|-----------------------------------------------------------------------------------|--------------------------------------------------------------|--------------------------------|-------------------------------------------------------|----------------------------------------------------------------------|
| 0 %                   | 0.827                                          | 1.09                                                               | 1236.41                                      | 1022.51                                                            | 7.910                                                                             | 5.782                                                        | 1.000                          | 11.496                                                | 0.809                                                                |
| 0.25 %                | 0.832                                          | 1.33                                                               | 1236.48                                      | 1028.75                                                            | 7.861                                                                             | 5.765                                                        | 1.006                          | 13.941                                                | 0.888                                                                |
| 0.50 %                | 0.831                                          | 1.30                                                               | 1242.27                                      | 1032.32                                                            | 7.798                                                                             | 5.741                                                        | 1.006                          | 13.516                                                | 0.875                                                                |
| 0.75 %                | 0.834                                          | 1.32                                                               | 1257.67                                      | 1048.89                                                            | 7.581                                                                             | 5.661                                                        | 1.014                          | 13.342                                                | 0.870                                                                |
| 1 %                   | 0.836                                          | 1.43                                                               | 1261.35                                      | 1054.48                                                            | 7.518                                                                             | 5.637                                                        | 1.018                          | 14.335                                                | 0.900                                                                |

**Table 2:** Values of density, viscosity, ultrasonic velocity and related acoustical parameters of various concentration of solution at 303 K

| Conc. of solution (%) | Density( $\rho$ ) ( $10^3 \text{ Kg m}^{-3}$ ) | Viscosity( $\eta$ ) ( $10^{-3} \text{ Kg m}^{-1} \text{ s}^{-1}$ ) | Ultrasonic velocity (U) ( $\text{ms}^{-1}$ ) | Acoustic Impedance (Z) ( $10^3 \text{ Kg m}^{-2} \text{ s}^{-1}$ ) | Adiabatic compressibility ( $\beta$ ) ( $10^{-10} \text{ Kg}^{-1} \text{ ms}^2$ ) | Intermolecular free length( $L_f$ ) ( $10^{-11} \text{ m}$ ) | Relative association ( $R_A$ ) | Relaxation time( $\tau$ ) ( $10^{-13} \text{ sec.}$ ) | Gibb's free energy( $\Delta G^*$ ) ( $10^{-20} \text{ J mol}^{-1}$ ) |
|-----------------------|------------------------------------------------|--------------------------------------------------------------------|----------------------------------------------|--------------------------------------------------------------------|-----------------------------------------------------------------------------------|--------------------------------------------------------------|--------------------------------|-------------------------------------------------------|----------------------------------------------------------------------|
| 0 %                   | 0.827                                          | 1.00                                                               | 1222.81                                      | 1011.26                                                            | 8.087                                                                             | 5.901                                                        | 0.996                          | 10.782                                                | 0.803                                                                |
| 0.25 %                | 0.831                                          | 1.20                                                               | 1218.99                                      | 1012.98                                                            | 8.098                                                                             | 5.905                                                        | 1.000                          | 12.957                                                | 0.879                                                                |
| 0.50 %                | 0.83                                           | 1.15                                                               | 1225.49                                      | 1017.15                                                            | 8.022                                                                             | 5.877                                                        | 1.001                          | 12.301                                                | 0.858                                                                |
| 0.75 %                | 0.833                                          | 1.19                                                               | 1240.03                                      | 1032.94                                                            | 7.807                                                                             | 5.798                                                        | 1.008                          | 12.387                                                | 0.861                                                                |
| 1 %                   | 0.836                                          | 1.27                                                               | 1246.31                                      | 1041.91                                                            | 7.701                                                                             | 5.758                                                        | 1.014                          | 13.040                                                | 0.882                                                                |

**Table 3:** Values of density, viscosity, ultrasonic velocity and related acoustical parameters of various concentration of solution at 308 K

| Conc. of solution (%) | Density( $\rho$ ) ( $10^3$ Kgm $^{-3}$ ) | Viscosity( $\eta$ ) ( $10^{-3}$ Kgm $^{-1}$ s $^{-1}$ ) | Ultrasonic velocity (U) (ms $^{-1}$ ) | Acoustic Impedance (Z) ( $10^3$ Kgm $^{-2}$ s $^{-1}$ ) | Adiabatic compressibility ( $\beta$ ) ( $10^{-10}$ Kg $^{-1}$ ms $^2$ ) | Intermolecular free length( $L_f$ ) ( $10^{-11}$ m) | Relative association ( $R_A$ ) | Relaxation time( $\tau$ ) ( $10^{-13}$ sec.) | Gibb's free energy( $\Delta G^*$ ) ( $10^{-20}$ Jmol $^{-1}$ ) |
|-----------------------|------------------------------------------|---------------------------------------------------------|---------------------------------------|---------------------------------------------------------|-------------------------------------------------------------------------|-----------------------------------------------------|--------------------------------|----------------------------------------------|----------------------------------------------------------------|
| 0 %                   | 0.806                                    | 0.91                                                    | 1204.99                               | 971.22                                                  | 8.545                                                                   | 6.121                                               | 0.966                          | 10.368                                       | 0.806                                                          |
| 0.25 %                | 0.828                                    | 1.07                                                    | 1201.58                               | 994.90                                                  | 8.365                                                                   | 6.056                                               | 0.992                          | 11.934                                       | 0.866                                                          |
| 0.50 %                | 0.827                                    | 1.03                                                    | 1210.01                               | 1000.67                                                 | 8.259                                                                   | 6.018                                               | 0.993                          | 11.342                                       | 0.844                                                          |
| 0.75 %                | 0.833                                    | 1.03                                                    | 1224.19                               | 1019.75                                                 | 8.010                                                                   | 5.927                                               | 1.004                          | 11.001                                       | 0.831                                                          |
| 1 %                   | 0.835                                    | 1.19                                                    | 1230.74                               | 1027.66                                                 | 7.906                                                                   | 5.888                                               | 1.008                          | 12.545                                       | 0.887                                                          |
